# Supplementary material for: The export of African mineral dust across the Atlantic and its impact over the Amazon Basin
Source: Copernicus journal article supplement (doi:10.5194/acp-2022-683), 2022-11-01
Supplement: Supplementary file 1 [file acp-2022-683-supplement.pdf]

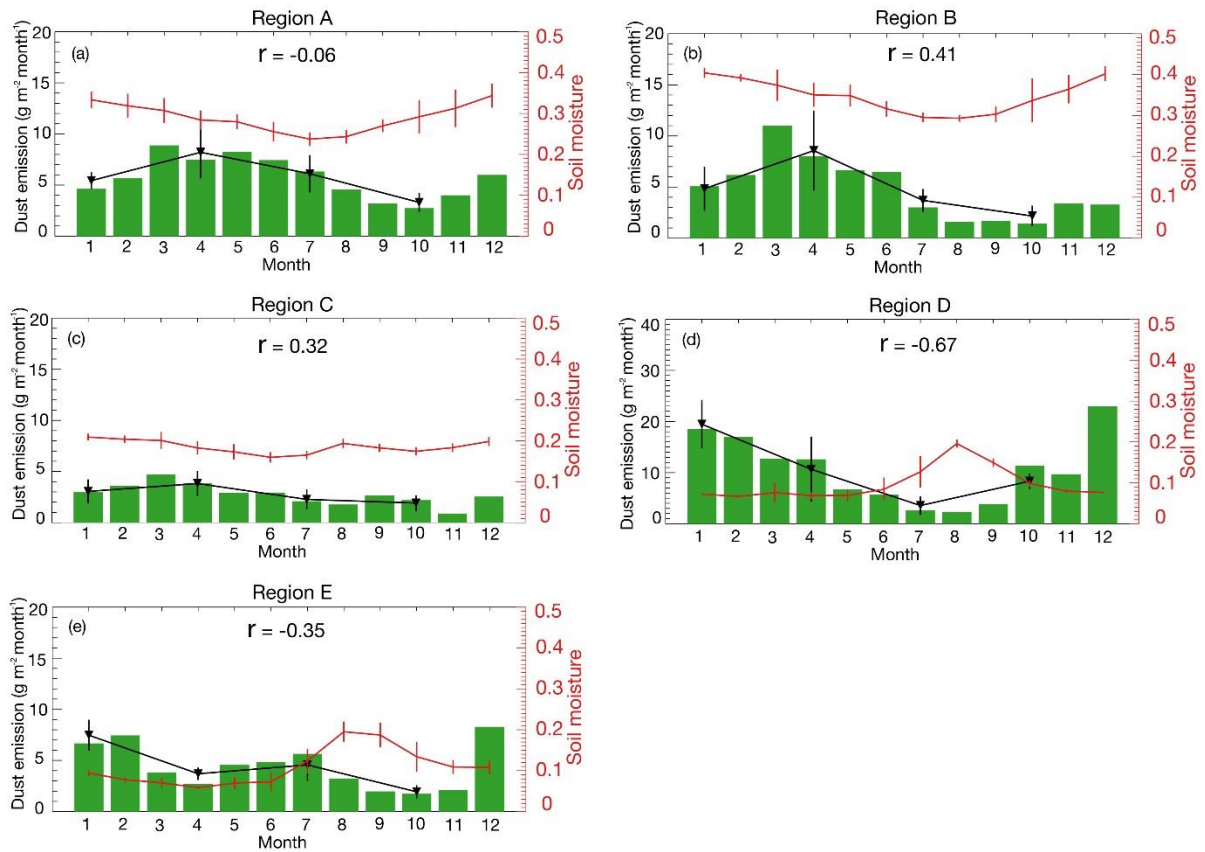

**Figure S1.** Monthly dust emission fluxes together with the soil moisture over each region averaged from 2013 to 2017. Seasonal fluxes of dust emissions are shown as black lines. The correlation coefficients ( $r$ ) between the dust emission fluxes and soil moisture are also shown as inset.

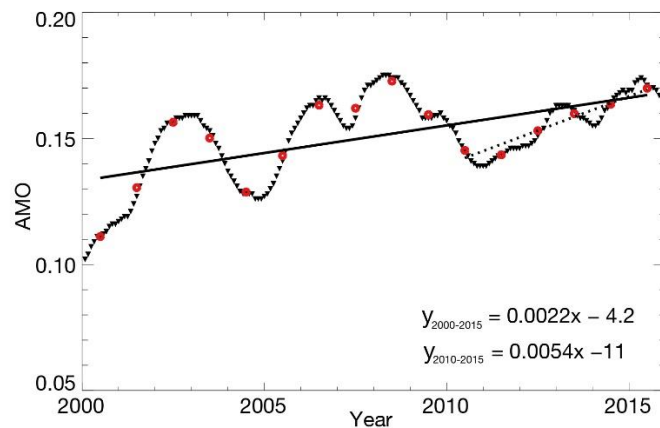

**Figure S2.** Time series of Atlantic Multidecadal Oscillation (AMO) during 2010-2015 together with the linear trends over the periods 2000 – 2015 and 2010 – 2015. The black triangles and red circles represent monthly and annual mean, respectively.

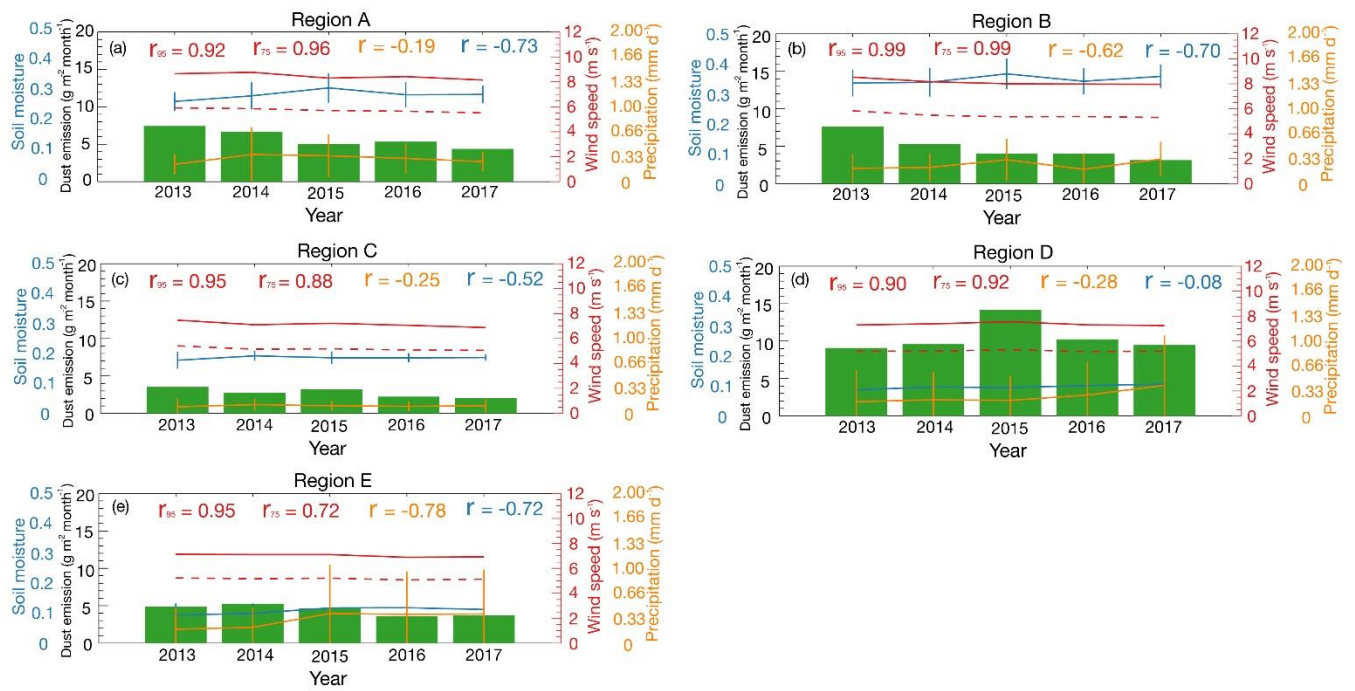

**Figure S3.** Annual dust emission fluxes together with the 95<sup>th</sup> percentile wind speeds (red lines), the 75<sup>th</sup> percentile wind speeds (red dotted lines), precipitation (yellow lines) and soil moisture (blue line) over each region from 2013 to 2017. The correlation coefficients ( $r$ ) between the dust emission fluxes and different meteorological variables are also shown as inset.

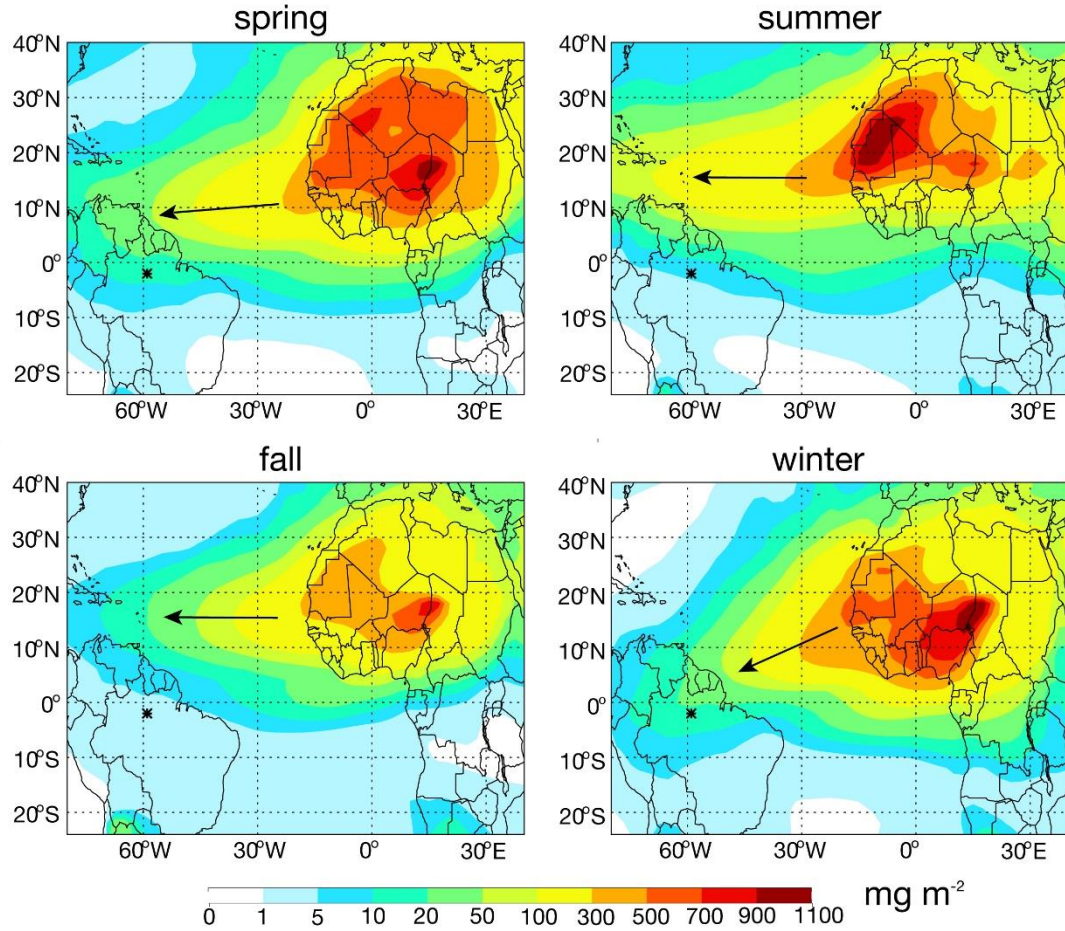

**Figure S4.** Simulated dust column burden averaged from 2013 to 2017 over the region between 80° W – 40° E and 25° S – 40° N. The location of ATTO site is marked as black asterisk and the transport paths of dust in four seasons are marked by black arrows.

**Table S1.** Annual dust emission fluxes ( $\text{g month}^{-1} \text{m}^{-2}$ ) over different source regions in northern Africa<sup>a</sup>.

| Year                        | Region A      | Region B      | Region C       | Region D     | Region E       |
|-----------------------------|---------------|---------------|----------------|--------------|----------------|
| 2013                        | 7.4           | 7.6           | 3.6            | 9.1          | 4.9            |
| 2014                        | 6.7           | 5.3           | 2.8            | 9.6          | 5.3            |
| 2015                        | 5.0           | 4.0           | 3.2            | 14           | 4.6            |
| 2016                        | 5.3           | 4.0           | 2.2            | 10           | 3.6            |
| 2017                        | 4.4           | 3.1           | 2.0            | 9.5          | 3.7            |
| Mean $\pm$ std <sup>b</sup> | 5.8 $\pm$ 1.3 | 4.8 $\pm$ 1.8 | 2.8 $\pm$ 0.64 | 11 $\pm$ 2.1 | 4.4 $\pm$ 0.74 |

<sup>a</sup> Region A: 15° W – 10° E, 21° N – 35° N; Region B: 10° E – 25° E, 25° N – 35° N; Region C: 25° E – 35° E, 15° N – 32° N; Region D: 12.5° E – 23° E, 13° N – 21° N; Region E: 17° W – 5° W, 15° N – 21° N.

<sup>b</sup> standard deviation

**Table S2.** Seasonal dust deposition ( $\text{Pg a}^{-1}$ ) as well as the ratio of deposition to total emission over northern Africa, AOaTP<sup>a</sup> and the Amazon Basin during 2013 – 2017.

| Region          | Spring       |       | Summer       |       | Fall          |       | Winter       |       |
|-----------------|--------------|-------|--------------|-------|---------------|-------|--------------|-------|
|                 | Dep          | Ratio | Dep          | Ratio | Dep           | Ratio | Dep          | Ratio |
| northern Africa | 0.51±0.090   | 54%   | 0.38±0.10    | 64%   | 0.26±0.055    | 60%   | 0.44±0.085   | 48%   |
| AOaTP           | 0.073±0.031  | 7.7%  | 0.079±0.034  | 13%   | 0.063±0.019   | 15%   | 0.18±0.034   | 20%   |
| Amazon Basin    | 0.015±0.0064 | 1.6%  | 0.0089±0.045 | 1.5%  | 0.0022±0.0010 | 0.51% | 0.015±0.0033 | 1.6%  |

<sup>a</sup> Atlantic Ocean along the transport path, over the region between 20° – 50° W and 5° S – 25° N.

**Table S3.** Dust emission ( $\text{Pg a}^{-1}$ ) from northern Africa and its lifetime (d) along the trans-Atlantic transport during January – April of 2014 – 2016.

| year | January  |          | February |          | March    |          | April    |          |
|------|----------|----------|----------|----------|----------|----------|----------|----------|
|      | emission | lifetime | emission | lifetime | emission | lifetime | emission | lifetime |
| 2014 | 0.68     | 1.4      | 1.2      | 1.5      | 0.97     | 1.8      | 0.75     | 1.8      |
| 2015 | 1.5      | 1.5      | 0.92     | 1.4      | 1.5      | 1.6      | 1.2      | 1.9      |
| 2016 | 0.78     | 1.4      | 0.95     | 1.7      | 1.0      | 1.7      | 0.68     | 1.8      |
